# Supplementary material for: Magmatic evolution and magma chamber conditions of the Alpehué tephra from Sollipulli Volcano, Andean Southern Volcanic Zone, Chile/Argentina
Source: Springer Nature journal article supplement (doi:10.1007/s00410-024-02195-0), 2024-12-04
Supplement: MOESM1 [file 410_2024_2195_MOESM1_ESM.pdf]

**Supplement S1 to:**

**Magmatic evolution and magma chamber conditions of the Alpehué tephra from Sollipulli volcano, Andean Southern Volcanic Zone, Chile/Argentina**

Contributions to Mineralogy and Petrology. Freundt A, Strehlow K, Kutterolf S, Schindlbeck-Belo J.

Corresponding author: [afreundt@geomar.de](mailto:afreundt@geomar.de)

1) Sample list and locations

| Sample | Outcrop | Latitude  | Longitude | Sample type                                       | Tephra unit        |
|--------|---------|-----------|-----------|---------------------------------------------------|--------------------|
| C088   | C031    | -39,00505 | -71,02528 | main pumice                                       | Alpehué Fallout    |
| C091a  | C033    | -38,97386 | -71,04397 | main pumice                                       | Alpehué Fallout    |
| C163   | C071    | -39,06096 | -71,69541 | main pumice                                       | Alpehué Fallout    |
| C165   | C072    | -39,06485 | -71,66011 | main pumice                                       | Alpehué Ignimbrite |
| C166   |         |           |           | banded pumice                                     | Alpehué Ignimbrite |
| C167a  |         |           |           | dark gray speckled pumice                         | Alpehué Ignimbrite |
| C168   |         |           |           | gray pumice                                       | Alpehué Ignimbrite |
| C169   |         |           |           | knobbly lava clast                                | Alpehué Ignimbrite |
| C172a  | C073    | -39,07236 | -71,64624 | main pumice                                       | Alpehué Fallout    |
| C175   | C074    | -39,06895 | -71,62246 | main pumice                                       | Alpehué Ignimbrite |
| C176b  |         |           |           | main pumice                                       | Alpehué Fallout    |
| C420   | C209    | -38,92165 | -71,30750 | main pumice                                       | Alpehué Fallout    |
| C421   |         |           |           | dark crystal-rich pumice                          | Alpehué Fallout    |
| JK003  | C221    | -38,93910 | -71,32850 | glomerocrystic clast                              | Alpehué Fallout    |
| JK042  | C237    | -38,87925 | -71,27802 | obsidian                                          | Alpehué Fallout    |
| JK049  | C242    | -38,90542 | -71,29436 | glomerocrystic clast                              | Alpehué Fallout    |
| JK050  | C209    | -38,92165 | -71,30750 | main pumice                                       | Alpehué Fallout    |
| JK051  |         |           |           | main pumice                                       | Alpehué Fallout    |
| JK052  |         |           |           | main pumice                                       | Alpehué Fallout    |
| JK053  |         |           |           | main pumice                                       | Alpehué Fallout    |
| JK054  |         |           |           | main pumice                                       | Alpehué Fallout    |
| JK054a |         |           |           | gray pumice                                       | Alpehué Fallout    |
| JK055  |         |           |           | main pumice                                       | Alpehué Fallout    |
| JK056  |         |           |           | main pumice                                       | Alpehué Fallout    |
| JK057a |         |           |           | main pumice                                       | Alpehué Fallout    |
| JK057b |         |           |           | banded pumice                                     | Alpehué Fallout    |
| JK057c |         |           |           | gray pumice                                       | Alpehué Fallout    |
| JK065  |         |           |           | obsidian                                          | Alpehué Fallout    |
| JK066  |         |           |           | glomerocrystic clasts, a-d: different clast types | Alpehué Fallout    |
| JK068  |         |           |           | banded pumice                                     | Alpehué Fallout    |
| JK075  |         |           |           | knobbly lava, a-c: different clast types          | Alpehué Fallout    |
| JK079  |         |           |           | pumice (b) with glomerocrystic fragment (a)       | Alpehué Fallout    |
| JK100  |         |           |           | C221                                              | -38,93910          |
| JK107  | C222    | -38,96096 | -71,34883 | pumice (b) with glomerocrystic fragment (a)       | Alpehué Fallout    |
| JK109  |         |           |           | plutonic lithic                                   | Alpehué Fallout    |
| JK110  |         |           |           | knobbly lava                                      | Alpehué Fallout    |
| JK111  |         |           |           | glomerocrystic clast                              | Alpehué Fallout    |
| JK112  |         |           |           | (a) gray pumice (b) knobbly lava                  | Alpehué Fallout    |
| JK114  |         |           |           | knobbly lava                                      | Alpehué Fallout    |
| JK125  |         |           |           | (a) main pumice (b) knobbly lava                  | Alpehué Fallout    |
| JK191  |         |           |           | C257                                              | -38,81791          |

2) Field photographs showing typical Alpehué tephra outcrops from which samples were collected.

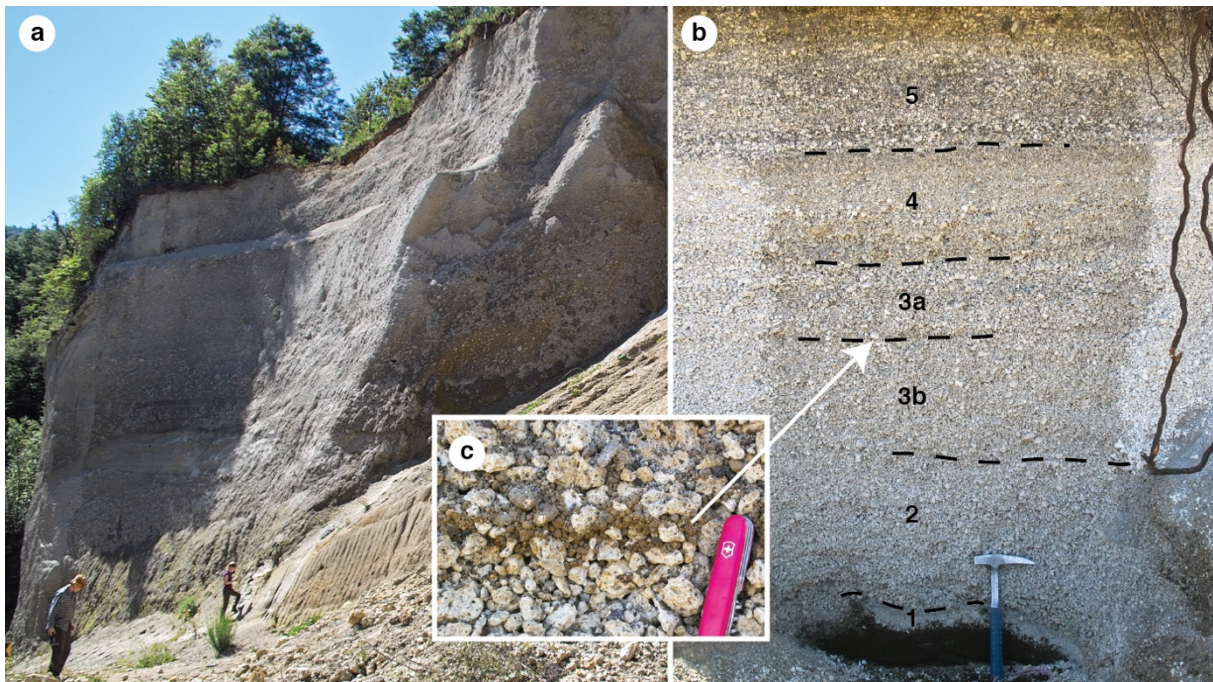

(a) Alpehué ignimbrite composed of several flow units at location C072 southwest of Sollipulli. (b) Fallout sequence ~40 km east of Sollipulli (Loc. C033) subdivided into five units 1-5. Arrow points at position of brown accretionary lapilli ash layer. (c) Detail of that ash layer with smooth round accretionary lapilli.
